# Supplementary material
Source: PubMed Central journal article supplement (PMC8195267)
Supplement: NIHMS1604257-supplement-Supplementary_4.pdf [file NIHMS1604257-supplement-Supplementary_4.pdf]

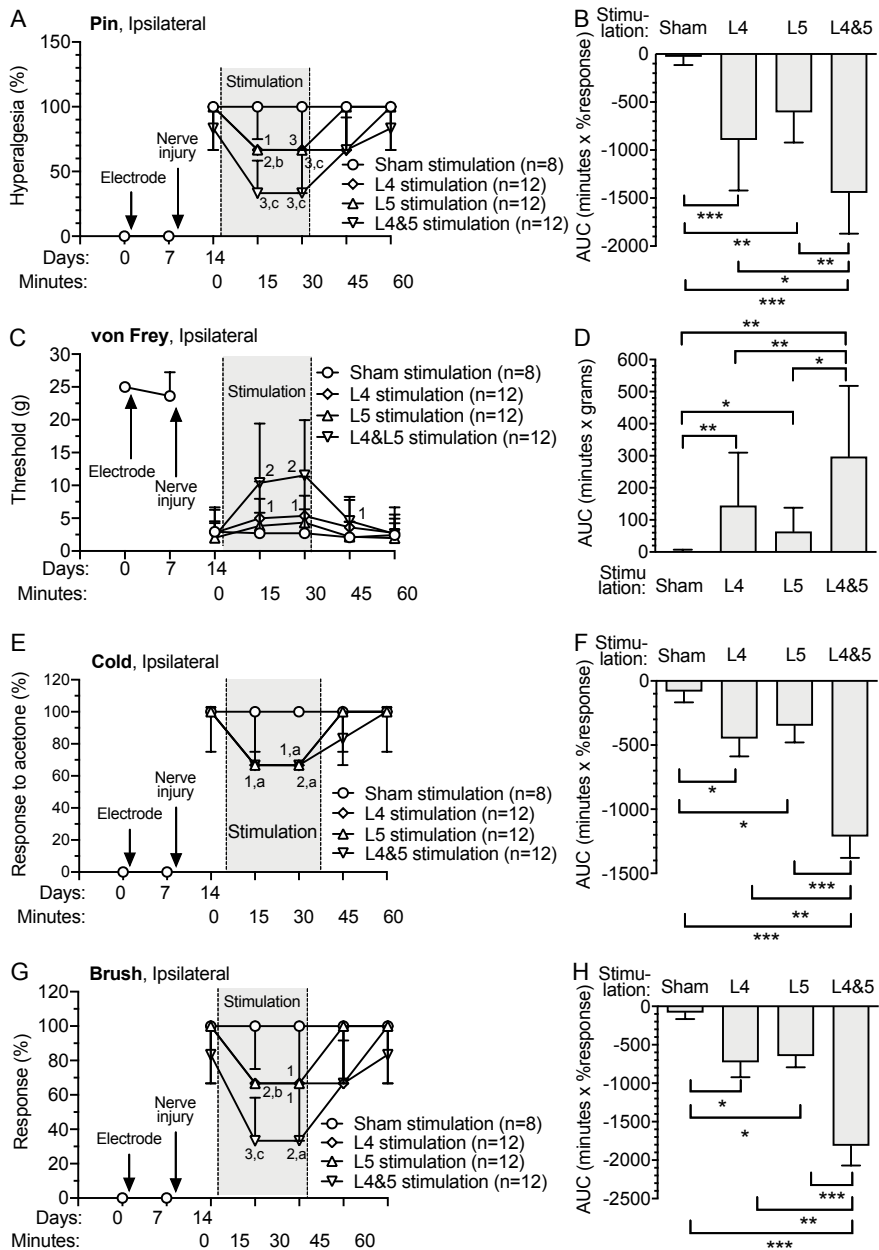

**Supplementary Figure 4.** Effects of dorsal root ganglion stimulation in rats with tibial nerve injury in which all rats had dorsal root ganglion stimulation electrodes implanted at both L4 and L5, and each rat participated in each treatment group. Tibial nerve injury surgeries were performed 14d after the electrode implantation. Time course for effects are shown in the left panels, and area under curve analysis for group comparisons are shown in the right panels, for sensitivity to noxious mechanical stimuli (pin [A, B]), threshold mechanical stimuli (von Frey [C, D]), cold (E, F), and brush (G, H). The Sham treatment group consisted of animals with dorsal root ganglion stimulation electrodes that were inserted but not activated. Results in A, E, G are median  $\pm$  interquartile range. Results in B, C, D, F, H are means  $\pm$  SD. 1,  $P < 0.05$ ; 2,  $P < 0.01$ ; 3,  $P < 0.001$  compared to data immediately before dorsal root ganglion stimulation and a,  $P < 0.05$ , b,  $P < 0.01$ , c,  $P < 0.001$  compared to sham treatment group by the Dunnett's test following two-way repeated-measures ANOVA with Greenhouse-Geisser correction. \* $P < 0.05$ , \*\* $P < 0.01$ , \*\*\* $P < 0.001$  by the Tukey test following one-way ANOVA. n, number of animals.
