# Supplementary material
Source: PubMed Central journal article supplement (PMC8195267)
Supplement: NIHMS1604257-supplement-Supplemetary_2.pdf [file NIHMS1604257-supplement-Supplemetary_2.pdf]

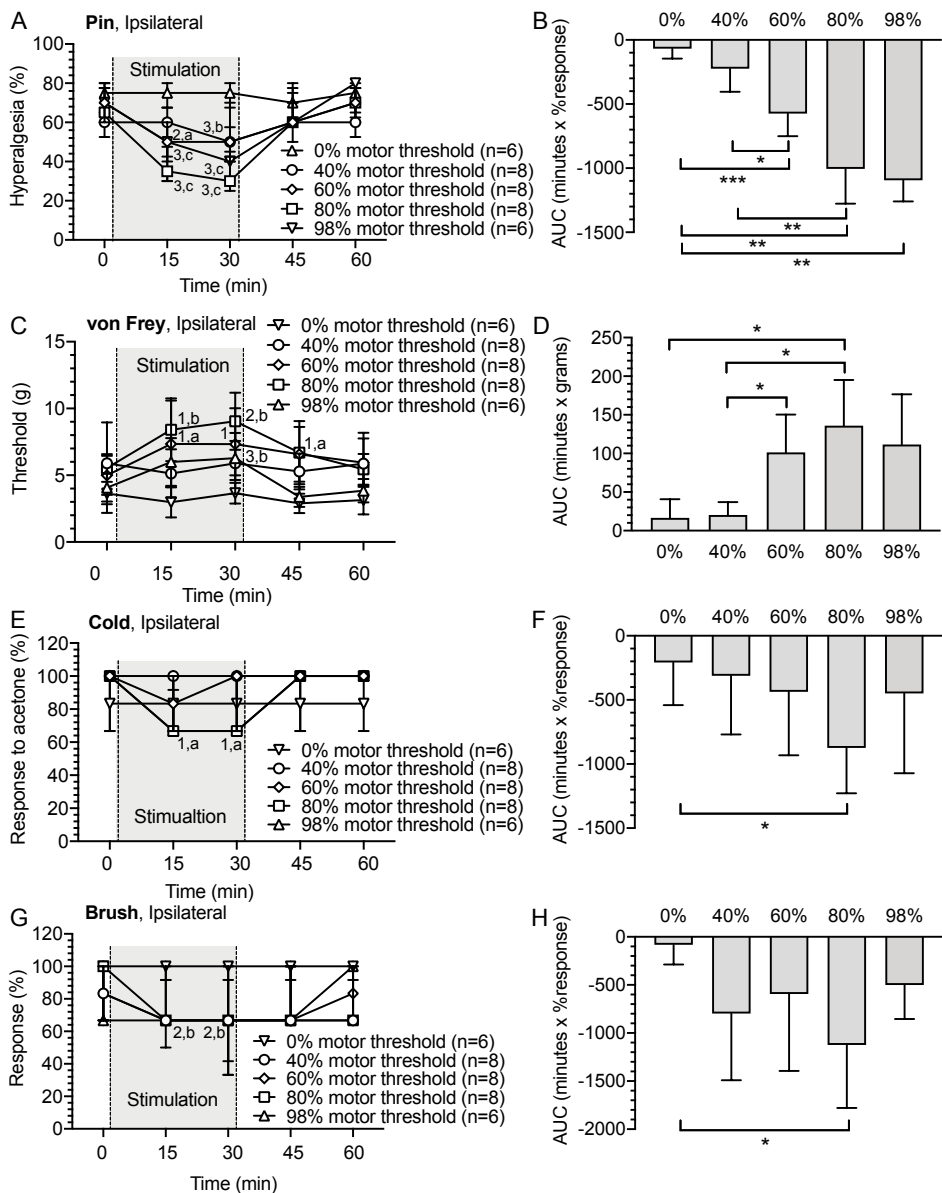

**Supplementary Figure 2.** Effects of dorsal root ganglion stimulation with different intensities in rats with tibial nerve injury. Time course for effects are shown in the left panels, and area under curve analysis for group comparisons are shown in the right panels, for sensitivity to noxious mechanical stimuli (pin [A, B]), threshold mechanical stimuli (von Frey [C, D]), cold (E, F), and brush (G, H). Results in A, E, G are median  $\pm$  interquartile range. Results in B, C, D, F, H are means  $\pm$  SD. 1,  $P < 0.05$ ; 2,  $P < 0.01$ ; 3,  $P < 0.001$  compared to data immediately before dorsal root ganglion stimulation and a,  $P < 0.05$ ; b,  $P < 0.01$ ; c,  $P < 0.001$  compared to 0% motor threshold group by the Dunnett's test following two-way repeated-measures ANOVA with Greenhouse-Geisser correction. \* $P < 0.05$ , \*\* $P < 0.01$ , \*\*\* $P < 0.001$  by the Tukey test following one-way ANOVA. n, number of animals.
